# Supplementary material for: Kinetic Profiles of Inflammatory Mediators in the Conjunctival Sac Fluid of Patients upon Photorefractive Keratectomy
Source: Hindawi journal article supplement (doi:10.1155/2015/942948), 2015-01-01
Supplement: f1 [file 942948.f1.pdf]

**Supplementary Table 1. Cytokines and chemokines levels in control conjunctival sac fluids and blood samples**

| Cytokines and chemokines |                                                        | Conjunctival sac fluid levels (pg/ml) <sup>a</sup> | Serum levels (pg/ml) <sup>a</sup> |
|--------------------------|--------------------------------------------------------|----------------------------------------------------|-----------------------------------|
| <b>EGF</b>               | Endothelial growth factor                              | 105.0 (125.8±72.9)                                 | 242 (301.5±147.7)                 |
| <b>Eotaxin</b>           | C-C motif chemokine 11; eosinophil chemotactic protein | 4.4 (6.3±5.1)                                      | 85.7 (92.9±45.8)                  |
| <b>G-CSF</b>             | Granulocyte colony-stimulating factor                  | 38.9 (50.2±32.4)                                   | 21.6 (24.7±13.1)                  |
| <b>GM-CSF</b>            | Granulocyte-Macrophage Colony Stimulating Factor       | 1.3 (1.5±0.8)                                      | 5.2 (4.9±1)                       |
| <b>IFN-α2</b>            | Interferon, alpha2                                     | 40.5 (53.6±40.0)                                   | 5.7 (5.1±1.8)                     |
| <b>IFN-γ</b>             | Interferon, gamma                                      | 3.1 (3.3±1.2)                                      | 2.5 (5.5±9)                       |
| <b>IL-10</b>             | Interleukin 10                                         | 2.0 (2.3±1.3)                                      | <OOR                              |
| <b>IL-12 (p40)</b>       | Interleukin-12 subunit p40                             | 5.4 (6.5±3.4)                                      | <OOR                              |
| <b>IL-12 (p70)</b>       | Interleukin-12 subunit p70                             | 3.2 (3.3±1.0)                                      | 2.1 (2.4±0.7)                     |
| <b>IL-13</b>             | Interleukin 13                                         | 23.1 (27.5±16.3)                                   | <OOR                              |
| <b>IL-15</b>             | Interleukin 15                                         | 2.3 (2.2±0.5)                                      | <OOR                              |
| <b>IL-17A</b>            | Interleukin 17                                         | <OOR                                               | <OOR                              |
| <b>IL-1RA</b>            | Interleukin-1 receptor antagonist                      | 970.0 (1056.2±687.5)                               | 10.6 (10.3±3.1)                   |
| <b>IL-1α</b>             | Interleukin 1, alpha                                   | 16.5 (18.9±7.8)                                    | <OOR                              |
| <b>IL-1β</b>             | Interleukin 1, beta                                    | 2.2 (2.4±0.9)                                      | <OOR                              |
| <b>IL-2</b>              | Interleukin 2                                          | 1.0 (1.1±0.4)                                      | <OOR                              |
| <b>IL-3</b>              | Interleukin 3                                          | <OOR                                               | <OOR                              |
| <b>IL-4</b>              | Interleukin 4                                          | 6.1 (12.6±20.0)                                    | <OOR                              |
| <b>IL-5</b>              | Interleukin 5                                          | 1.6 (2.8±3.8)                                      | <OOR                              |
| <b>IL-6</b>              | Interleukin 6                                          | 2.7 (2.9±1.6)                                      | <OOR                              |
| <b>IL-7</b>              | Interleukin-7                                          | 27.3 (26.8±10.9)                                   | 2.5 (2.8±0.9)                     |
| <b>IL-8</b>              | Interleukin 8                                          | 19.9 (23.9±8.8)                                    | 4.9 (5.9±2.5)                     |
| <b>IP-10</b>             | CXCL10                                                 | 2891.0 (3413.2±1793.8)                             | 198 (234.7±90.4)                  |
| <b>MCP-1</b>             | CCL2                                                   | 76.2 (113.9±97.4)                                  | 407 (407.8±187)                   |
| <b>MIP-1α</b>            | CCL3                                                   | 6.3 (7.5±3.9)                                      | 0 (2.1±3.2)                       |
| <b>MIP-1β</b>            | CCL4                                                   | 5.6 (6.3±1.9)                                      | 36.9 (42.7±23.5)                  |
| <b>TNF-α</b>             | Tumor necrosis factor, alpha                           | 0.6 (0.5±0.4)                                      | 7.6 (7.6±2.9)                     |
| <b>TNF-β</b>             | Tumor necrosis factor, beta                            | 0.0 (0.7±0.8)                                      | <OOR                              |
| <b>VEGF</b>              | Vascular endothelial growth factor                     | 52.6 (55.3±26.1)                                   | 79.3 (96±49.7)                    |

<sup>a</sup>Values are expressed as Median (Mean±SD); OOR<: out (below) of detection range

**Supplementary Table 2. Identified Networks linking molecules showing kinetic Profile I and Profile II**

| Profile   | Network ID | Molecules in the Network                                                                                                                                                                                                                                                                                                                                                                                                                                                                                 | Score | Focus molecules | Top functions                                                                                     |
|-----------|------------|----------------------------------------------------------------------------------------------------------------------------------------------------------------------------------------------------------------------------------------------------------------------------------------------------------------------------------------------------------------------------------------------------------------------------------------------------------------------------------------------------------|-------|-----------------|---------------------------------------------------------------------------------------------------|
| <b>I</b>  | 1          | <b>MIP-1<math>\alpha</math></b> , <b>MIP-1<math>\beta</math></b> , <b>CCL11/Eotaxin</b> , Cpla2, <b>GM-CSF</b> , <b>G-CSF</b> , <b>CXCL10/IP10</b> , Eotaxin, Fcer1, Fcgr3, Ggt, Gm-csf, Gsk3, HLA-DQ, HLA-DR, Ifn gamma, Iga, Ige, <b>IL-4</b> , <b>IL-5</b> , <b>IL-10</b> , IL-15, <b>IL-12(complex)/IL-12(p70)</b> , <b>IL-12(p40)</b> , Immunoglobulin, Interferon alpha, lymphotoxin-alpha-beta2, MHC Class II (complex), Nr1h, PI3K (complex), STAT5a/b, Tlr, <b>TNF</b> , Tnf receptor, U1 snRNP | 25    | 12              | Cell-to-cell Signalling and Interaction, Cellular Movement, Immune Cell Trafficking               |
|           | 2          | Akt, Ap1, BCR (complex), CD3, Creb, Cyclin E, <b>EGF</b> , ERK, ERK1/2, Hsp27, Hsp90, IFN Beta, <b>IFN-<math>\gamma</math></b> , IgG, Igm, <b>IL-2</b> , <b>IL-7</b> , <b>IL-13</b> , IL-23, <b>IL-1<math>\alpha</math></b> , <b>IL-1RA</b> , JnK, <b>TNF</b> , Mapk, Nfat (family), NFkB (complex), P38 MAPK, PI3K (family) Ras, SAA, SRC (family), TCR, Vegf, <b>VEGF-A</b> , <b>VEGF-B</b>                                                                                                            | 20    | 10              | Cell-to-cell Signalling and Interaction, Cellular Growth and Proliferation, Inflammatory Response |
| <b>II</b> | 3          | Ap1, BAI1, <b>MCP-1</b> , Cdk, CLEC11A, <b>IL-8</b> , DGKH, ECE1, ERK, ERK1/2, Fcer1, FXN, GNA14, Histone h3, IL-1, <b>IL-6</b> , IL-36A, Jnk, LDL, LPAR3, MARVELD3, MYO1E, NFkB (complex), NOD1, P38 MAPK, PDGF-BB, PI3K (family), Pkc(s), PLA2G7, STAB2, TFF2, Tlr, TMEM9B, TRIO, VRK2                                                                                                                                                                                                                 | 8     | 3               | Inflammatory Disease, Connective tissue Disorders                                                 |

Network-eligible molecules/proteins that interact with other molecules in the Ingenuity Knowledge Database.

In bold: focus molecules belonging to the panel of cytokines/chemokines analysed.
